# Supplementary material for: Nitrate retention capacity of milldam-impacted legacy sediments and relict A horizon soils
Source: Copernicus journal article supplement (doi:10.5194/soil-3-95-2017), 2017-05-23
Supplement: Supplementary file 1 [file soil-3-95-2017-supplement.pdf]

Supplement of SOIL, 3, 95–112, 2017  
<http://www.soil-journal.net/3/95/2017/>  
doi:10.5194/soil-3-95-2017-supplement  
© Author(s) 2017. CC Attribution 3.0 License.

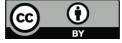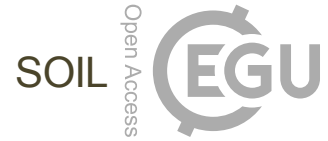

*Supplement of*

## **Nitrate retention capacity of milldam-impacted legacy sediments and relict A horizon soils**

**Julie N. Weitzman and Jason P. Kaye**

*Correspondence to:* Julie N. Weitzman ([julie.weitzman@asrc.cuny.edu](mailto:julie.weitzman@asrc.cuny.edu))

The copyright of individual parts of the supplement might differ from the CC-BY 3.0 licence.

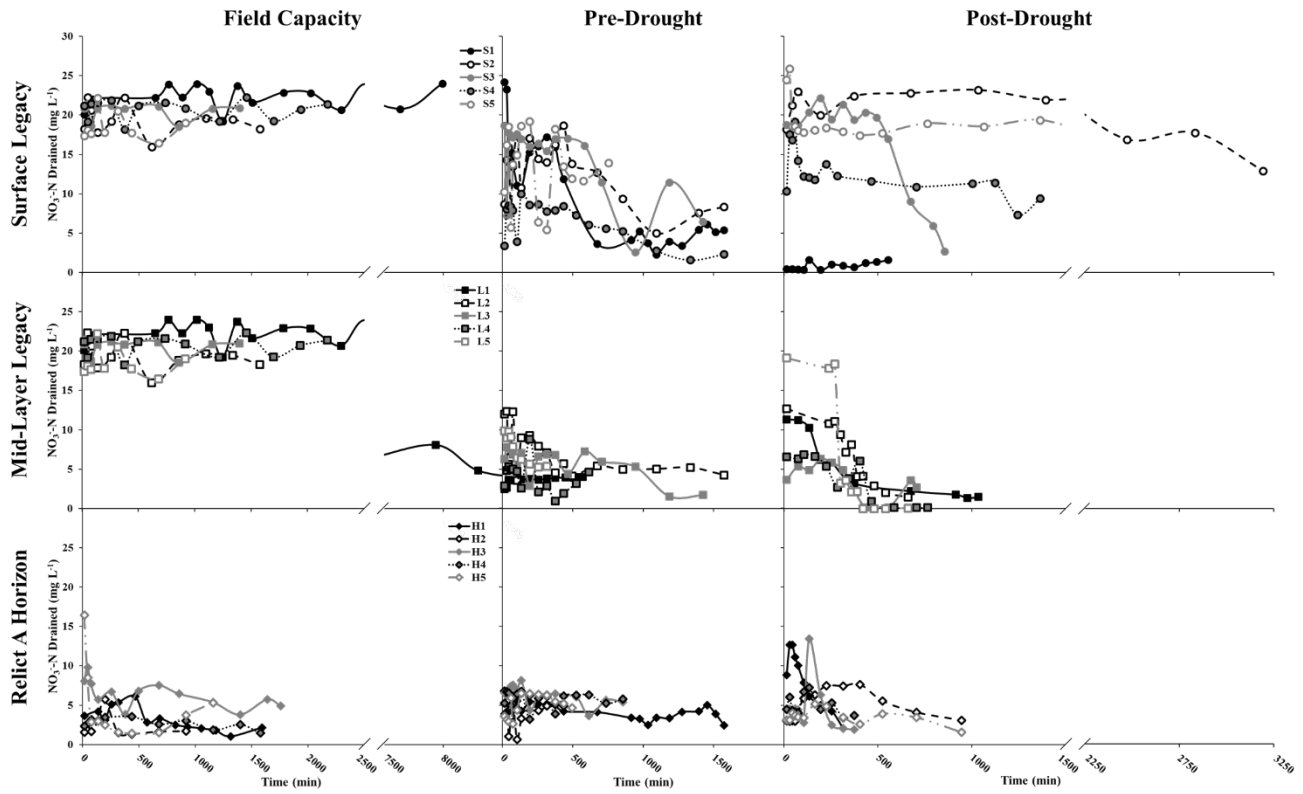

Supplementary Figure S1. Time series release curves depicting the release of leachate NO<sub>3</sub><sup>-</sup> over time for each of the five replicate soil columns from each of the three soil horizons of interest (surface legacy sediment, mid-layer legacy sediment, and relict A horizon soil) during field capacity, pre-drought, and post-drought conditions.
